# Supplementary material for: PRDM1 Drives Human Primary T Cell Hyporesponsiveness by Altering the T Cell Transcriptome and Epigenome
Source: PubMed Central journal article supplement (PMC9097451; doi:10.3389/fimmu.2022.879501), 2022-04-28

Fig.S1

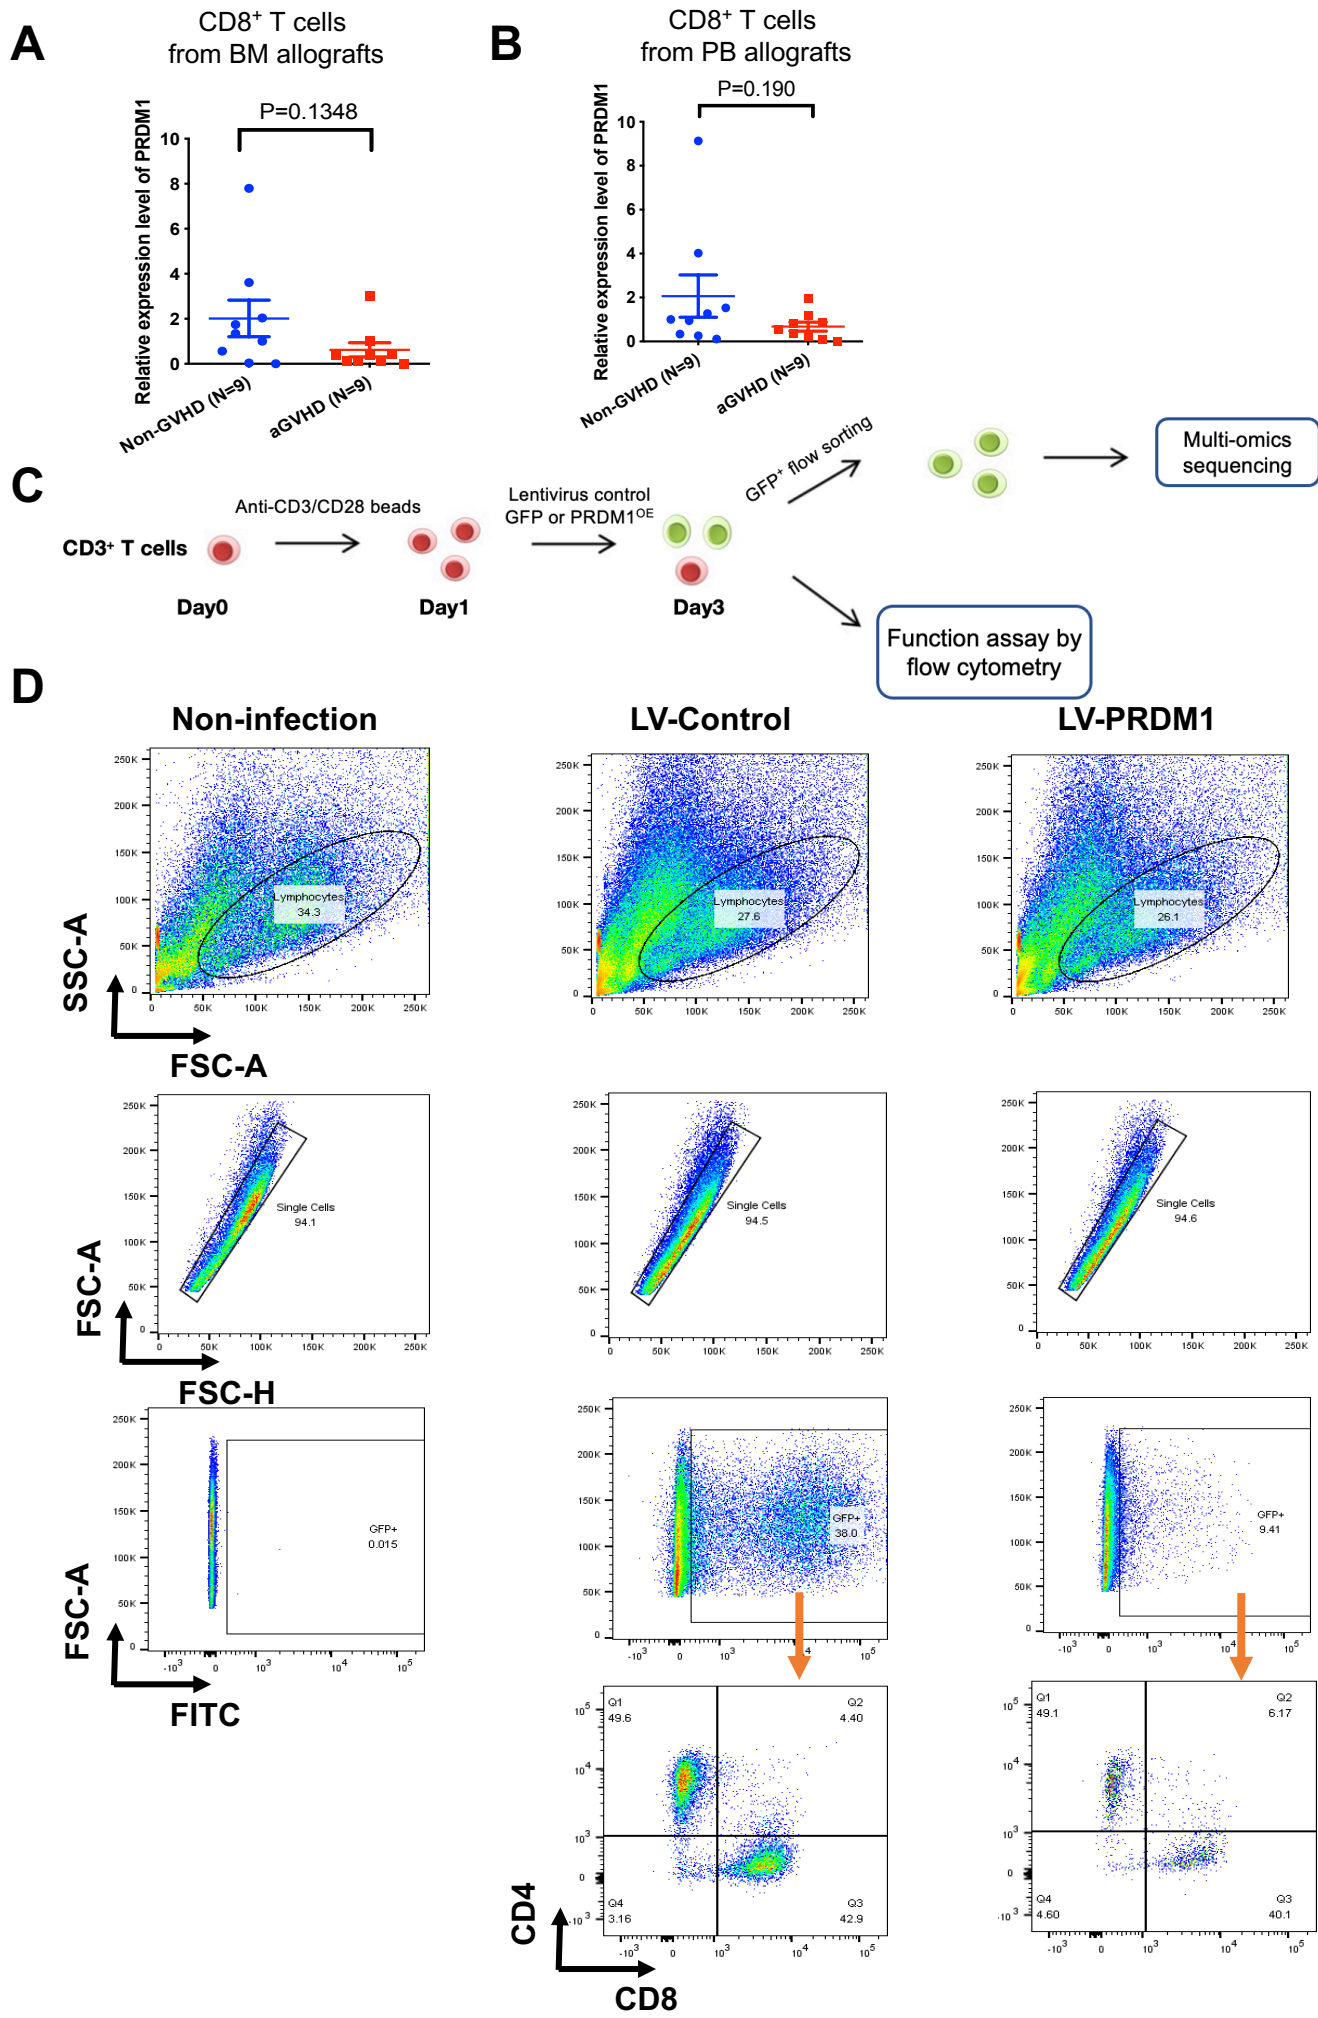

Fig.S2

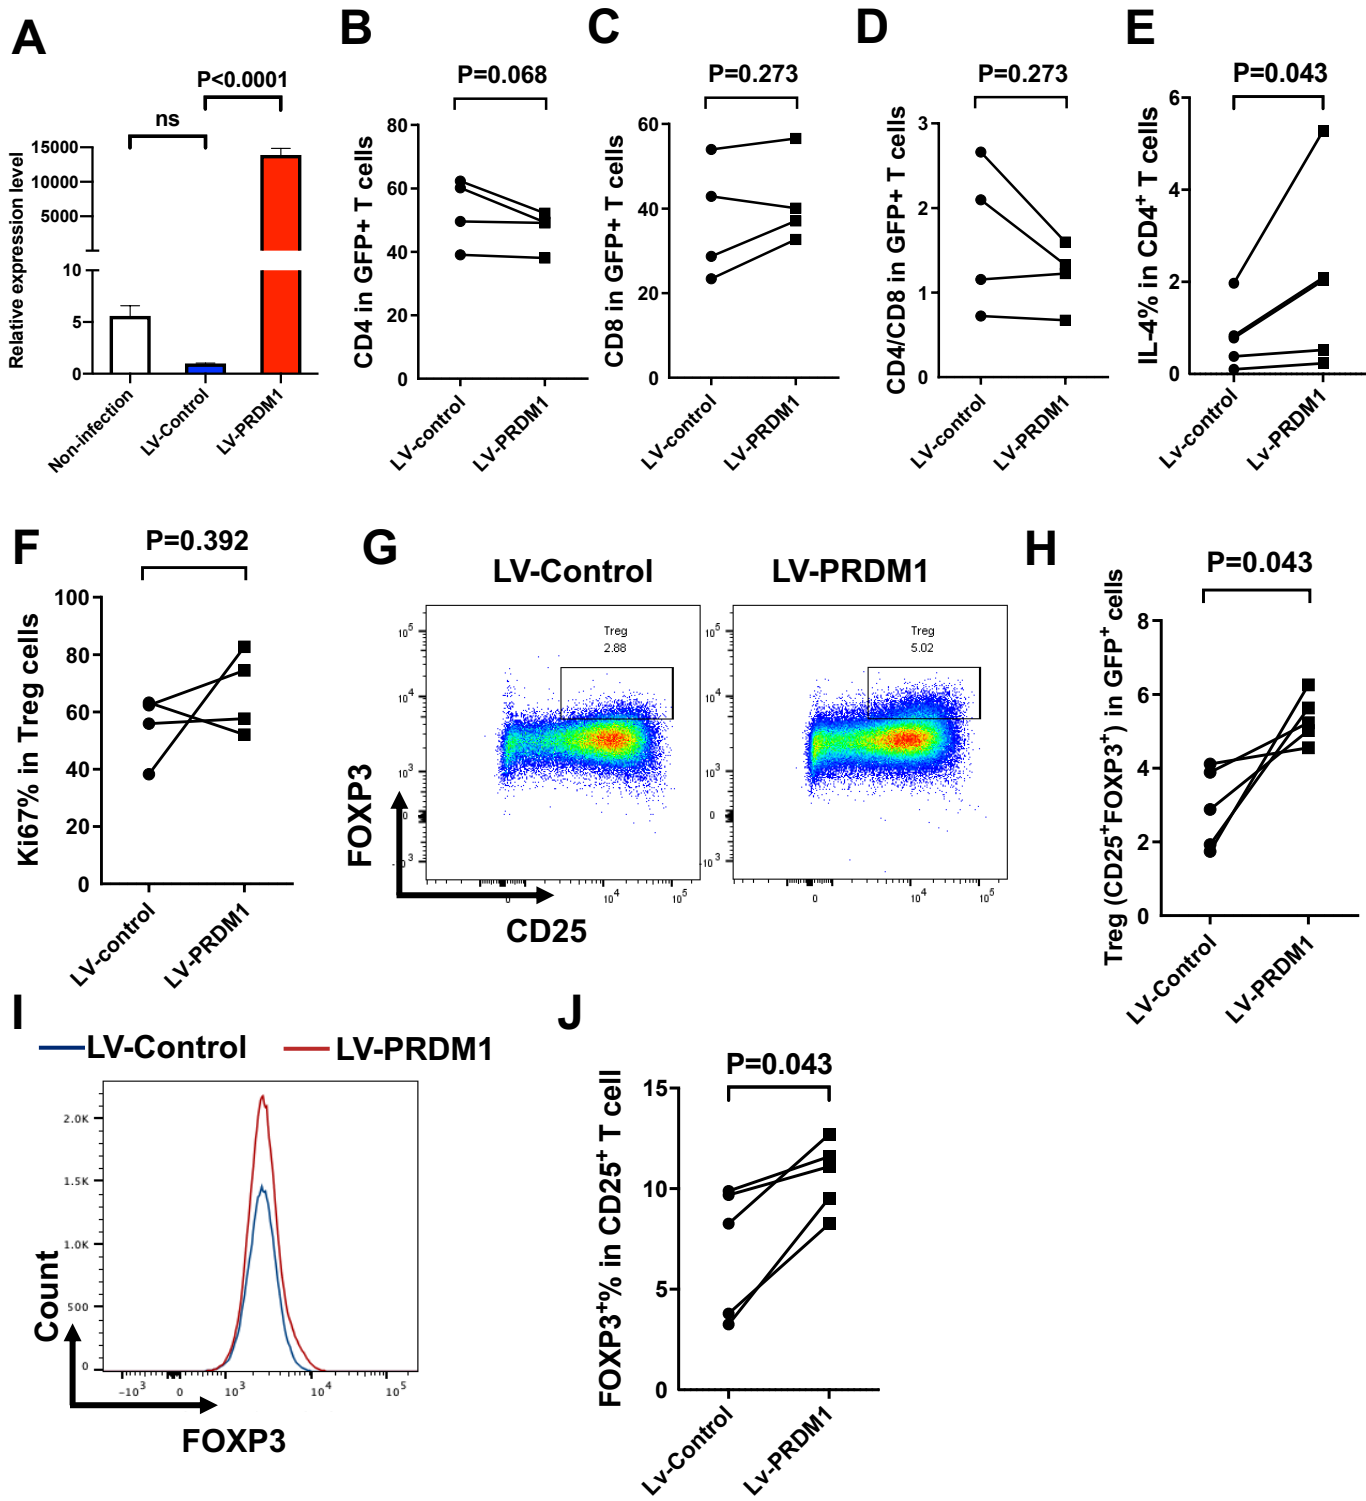

Fig.S3

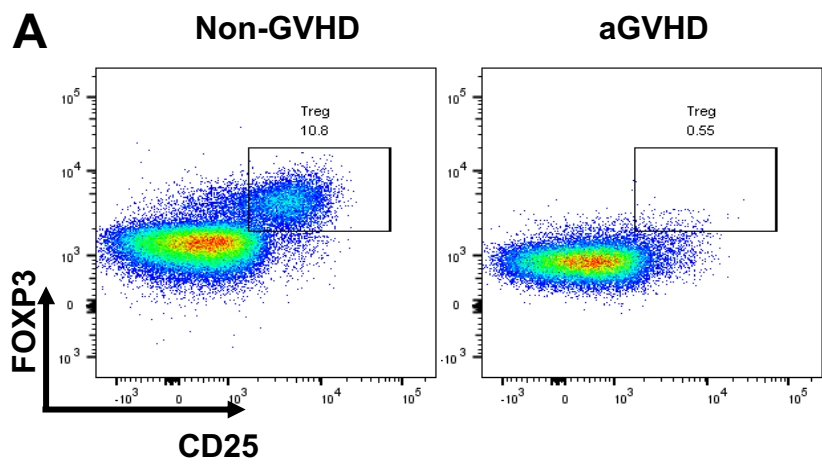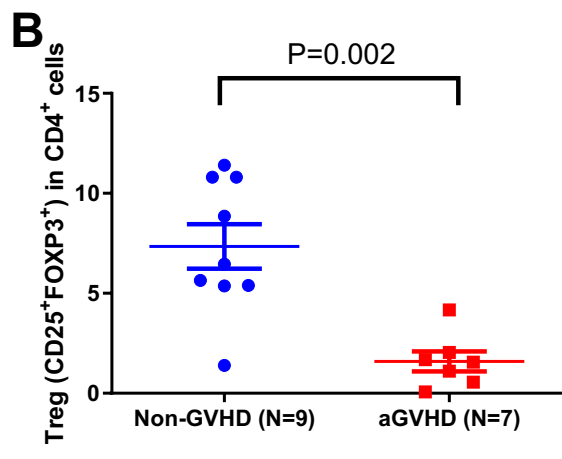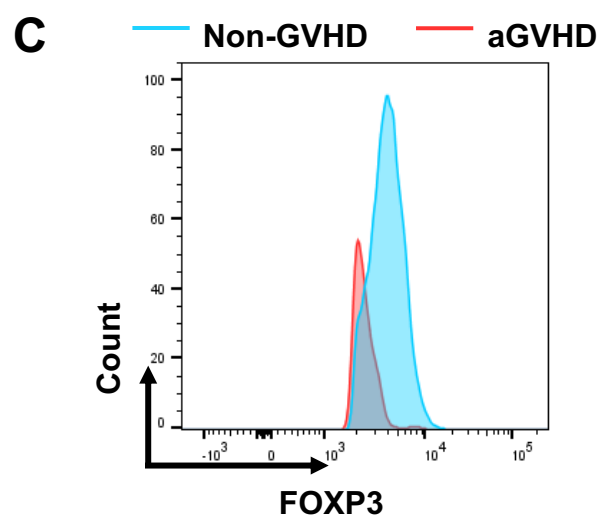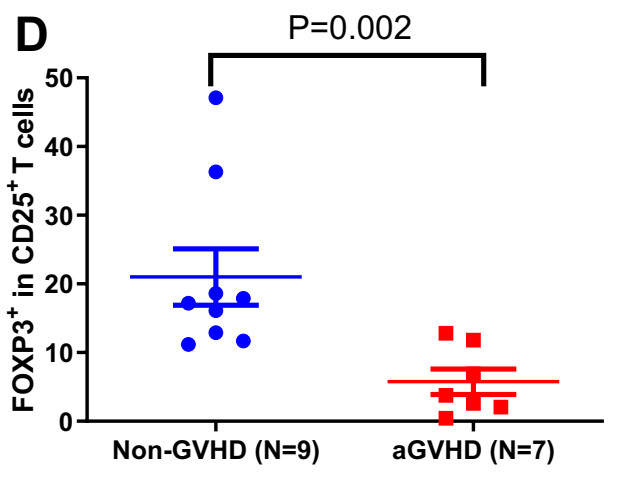

Fig.S4

**A**

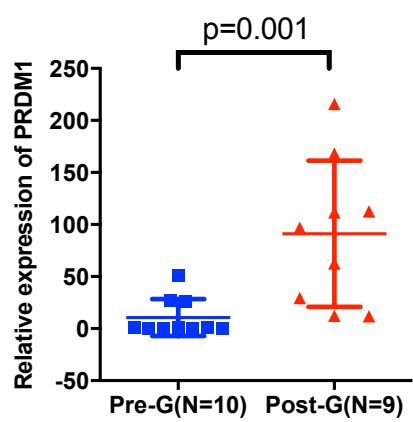

**B**

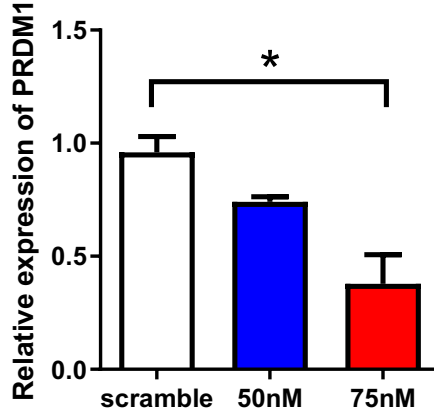

**C**

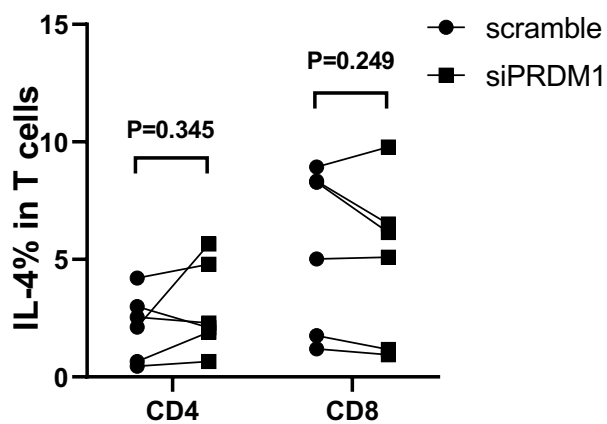

Fig.S5

**A**

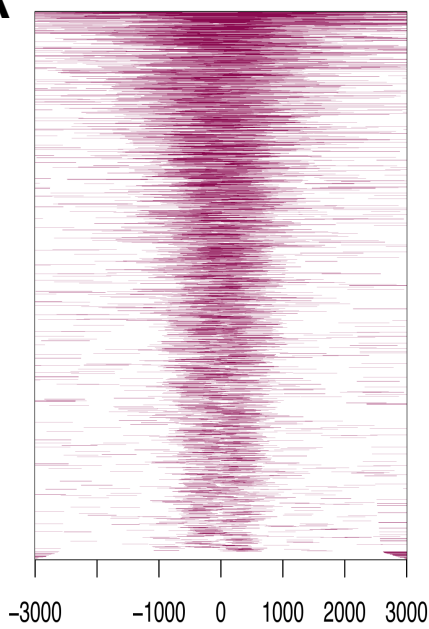

**B**

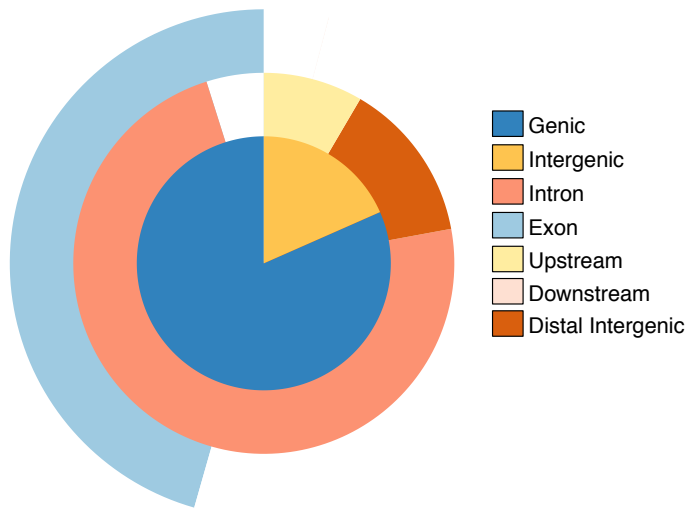

**C**

Insert Size Histogram for All Reads in file OE3.rmdup.bam

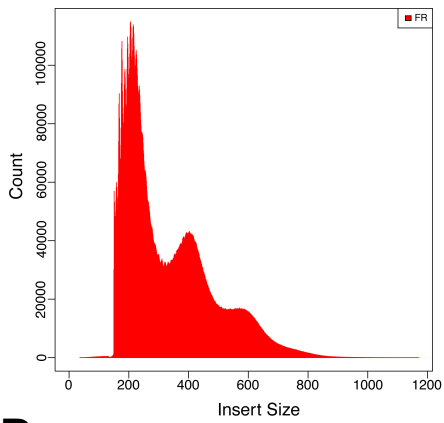

**E**

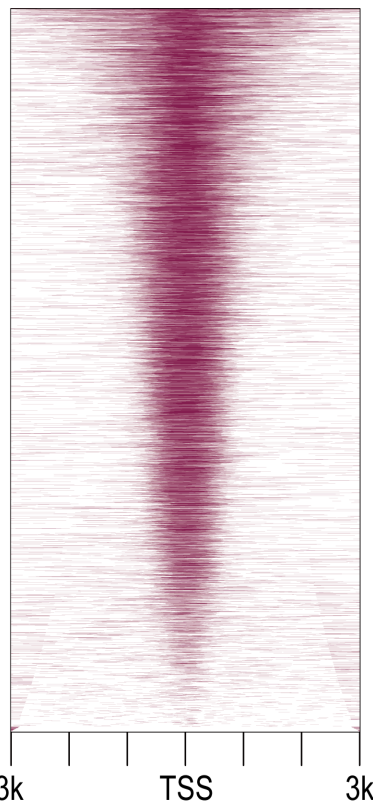

**F**

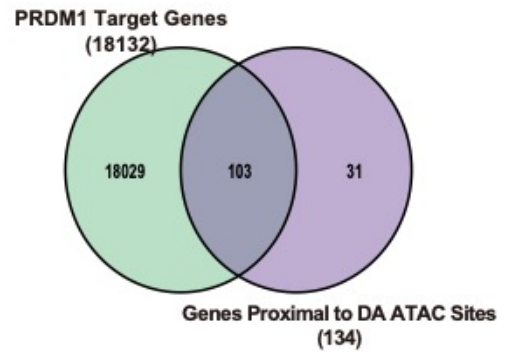

**D**

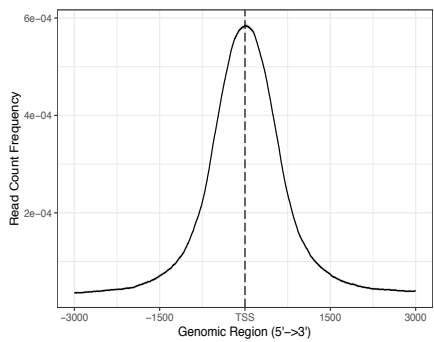

Fig.S6

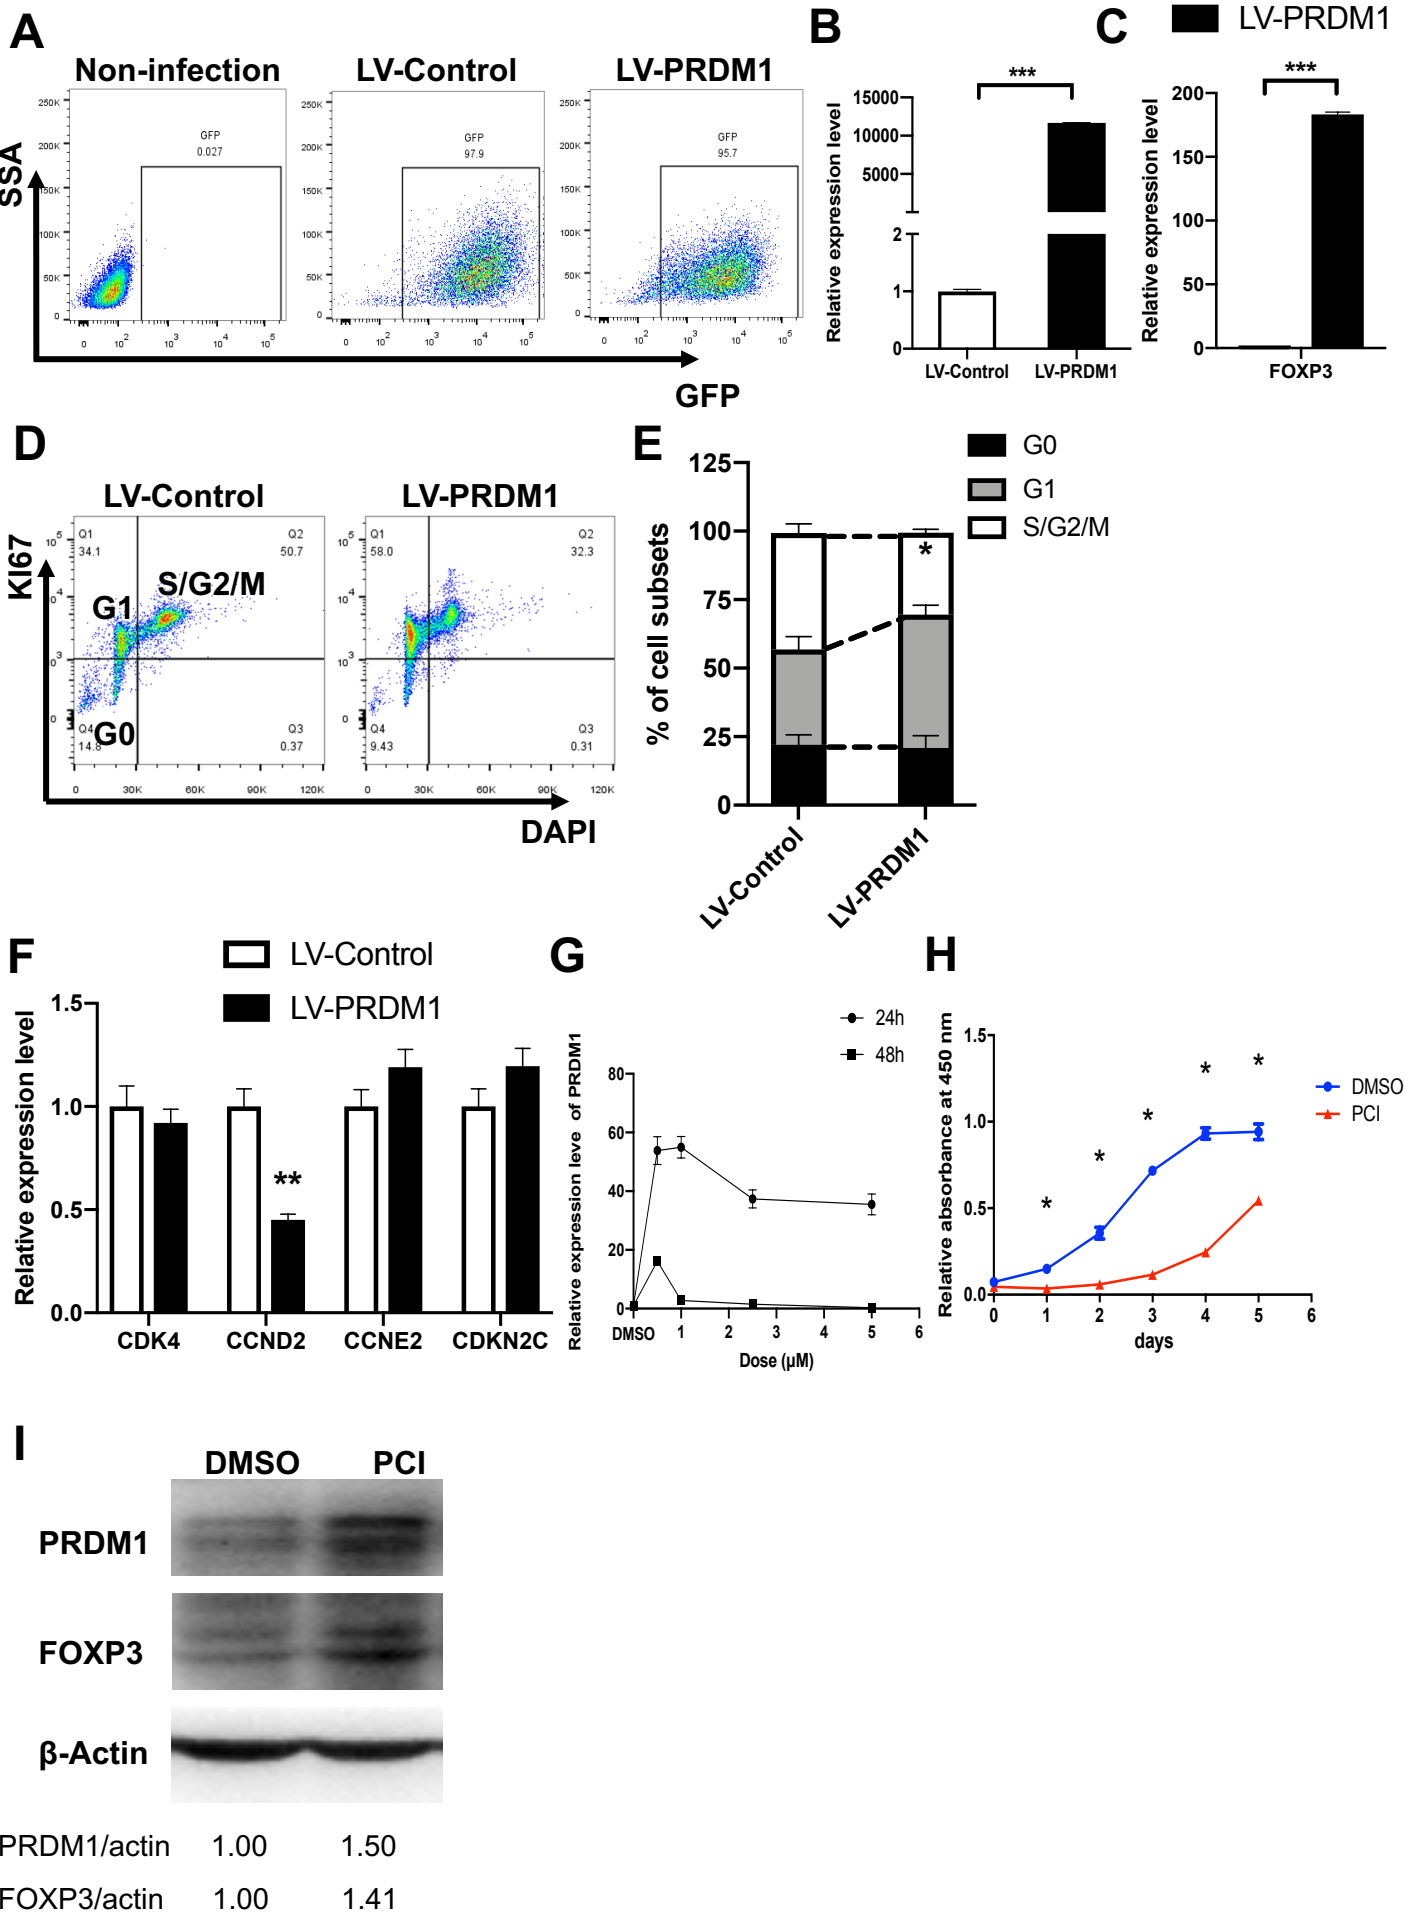

Fig.S7

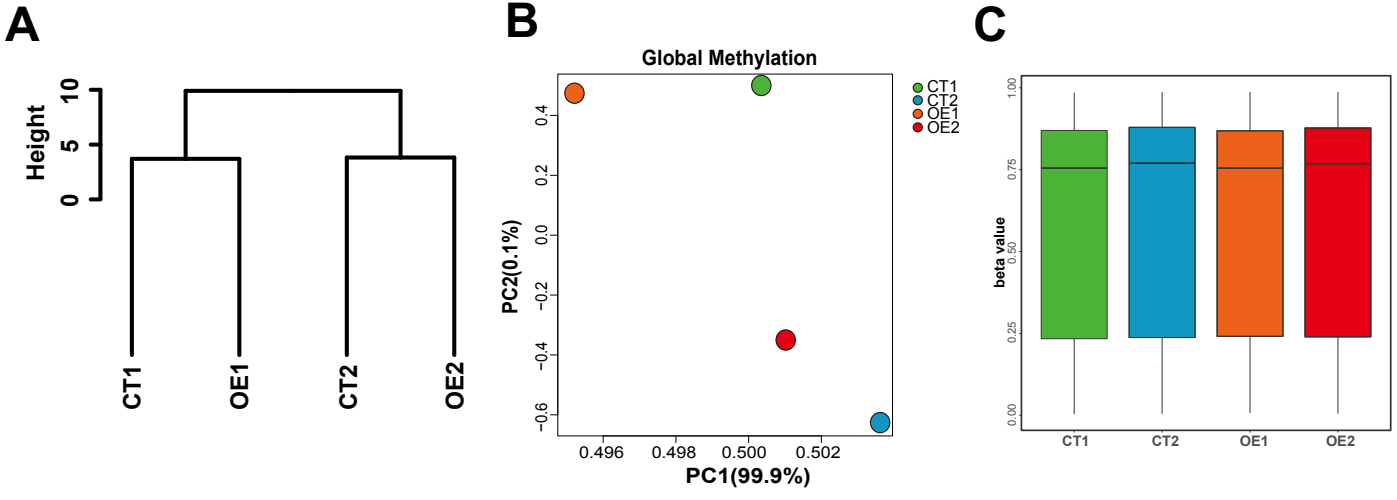

**D**

Position of selected amplicons on *FOXP3* gene region

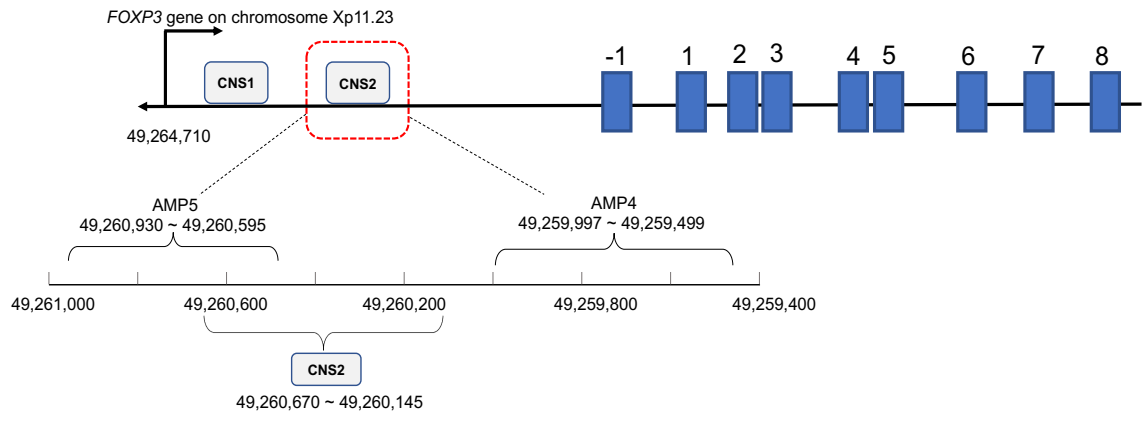

Supplement: DataSheet_1.pdf [file DataSheet_1.pdf]
